# Supplementary material for: Towards a protein-selective Raman enhancement by a glycopolymer-based composite surface
Source: Royal Society of Chemistry journal article supplement (doi:10.1039/d1tb02746h), 2022-01-01
Supplement: d1tb02746h1.pdf [file d1tb02746h1.pdf]

## Towards a protein-selective Raman enhancement by glycopolymer-based composite surface

Chuan Gu,<sup>a</sup> Fangjian Shan,<sup>a</sup> Lifang Zheng,<sup>a</sup> Yue Zhou,<sup>a</sup> Jun Hu,<sup>a</sup> and Gaojian Chen<sup>\*a</sup>

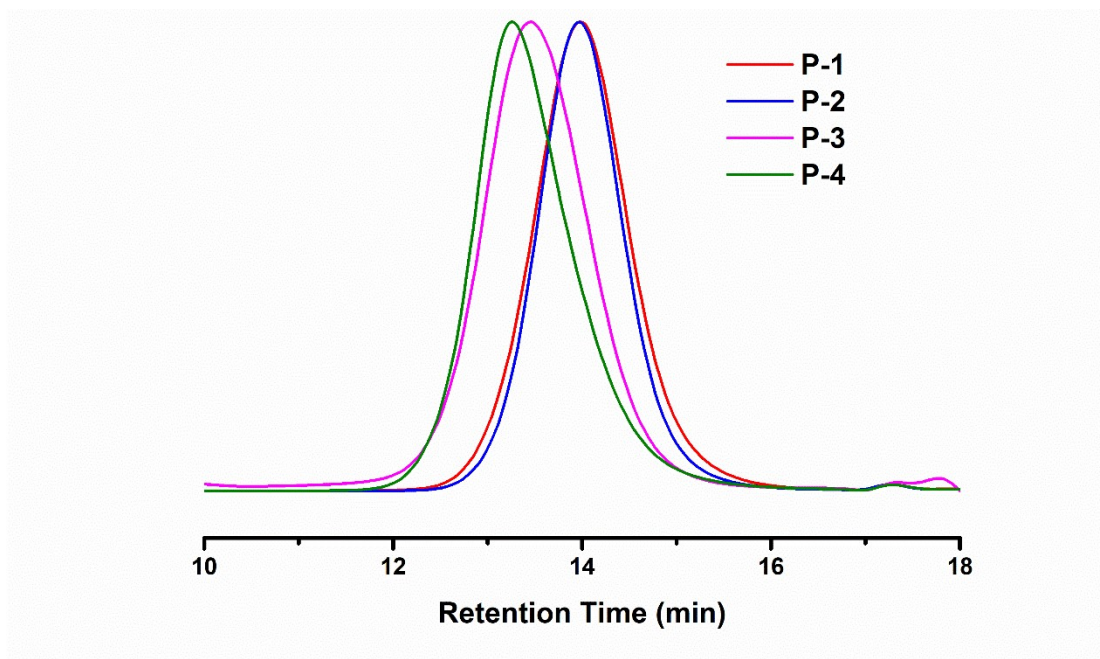

Fig. S1 Size-exclusion chromatography (SEC) spectra of glycopolymers.

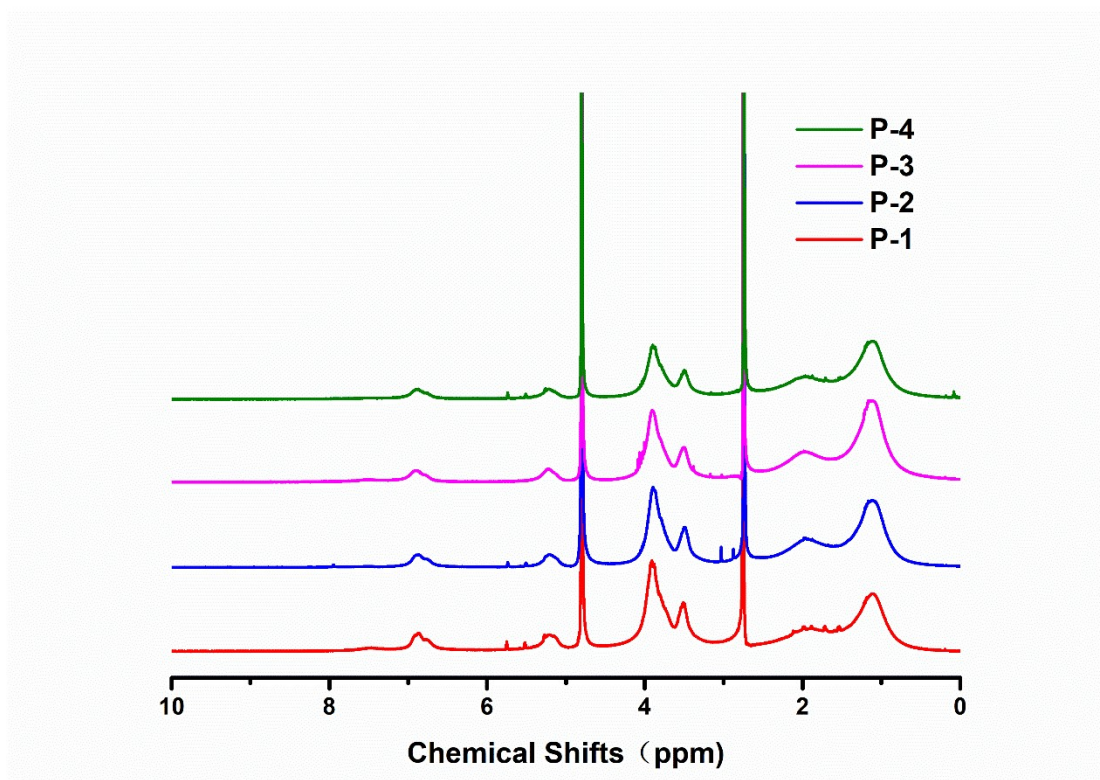

Fig. S2 <sup>1</sup>H NMR spectra of glycopolymers in D<sub>2</sub>O.

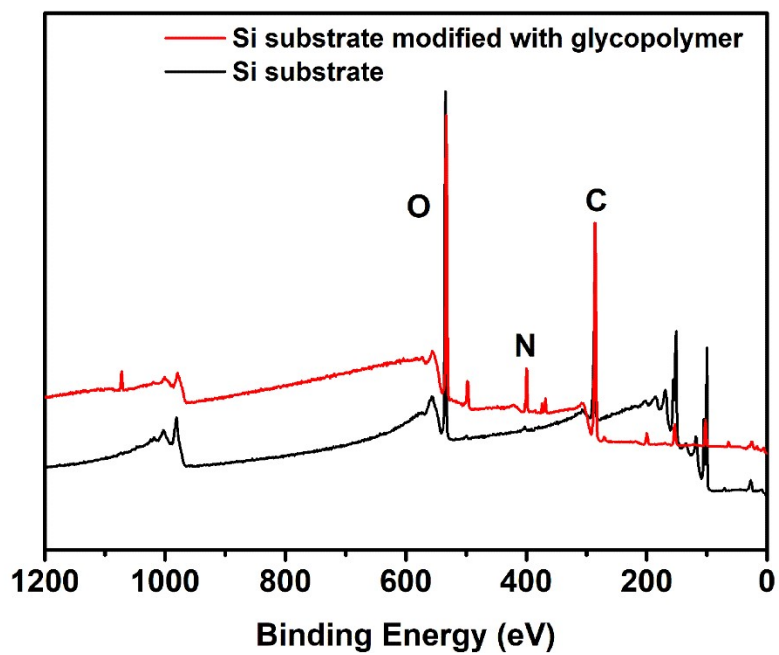

**Fig. S3** XPS spectra of the silicon without and with glycopolymer modification.

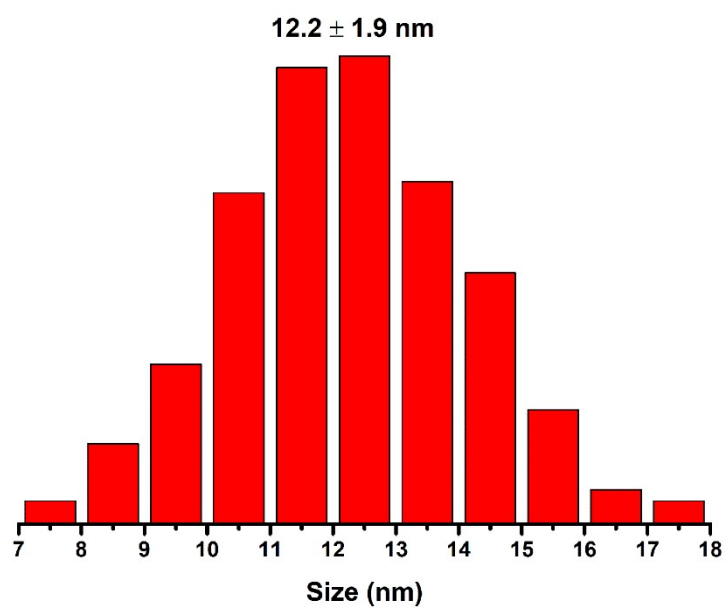

**Fig. S4** Statistics of AgNPs particle sizes from SEM image.

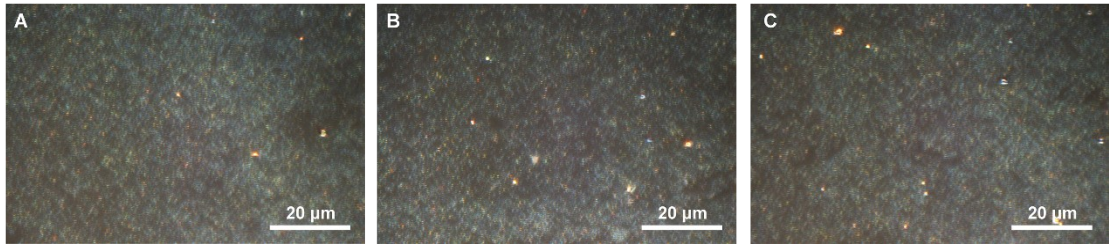

**Fig. S5** Polarized optical microscope images of the SERS substrate soaked in different solutions for 24 h. (A) the control group, (B) water, (C) HEPES buffer solution (pH = 7.5).

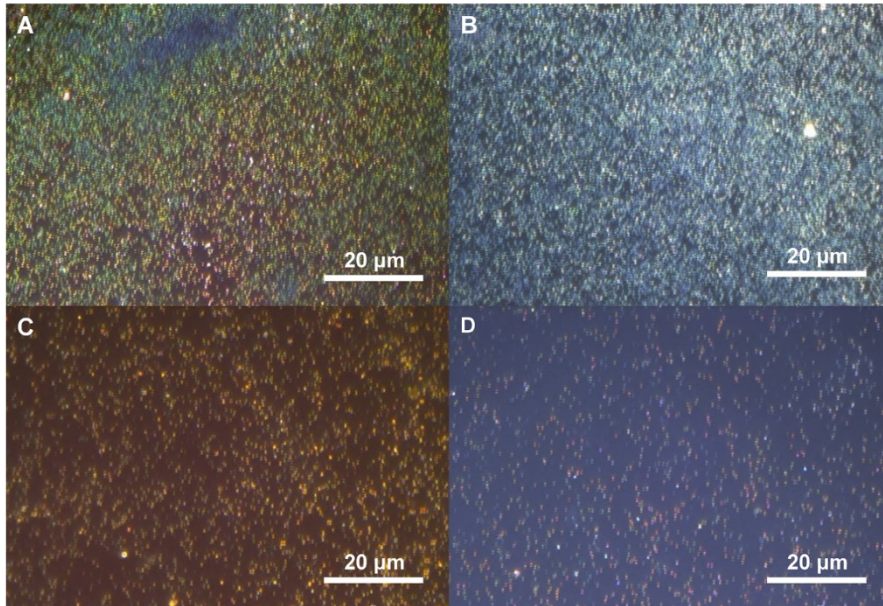

**Fig. S6** Polarized optical microscope images of the SERS substrate prepared by P-1 (A), P-2 (B), P-3 (C) and P-4 (D).

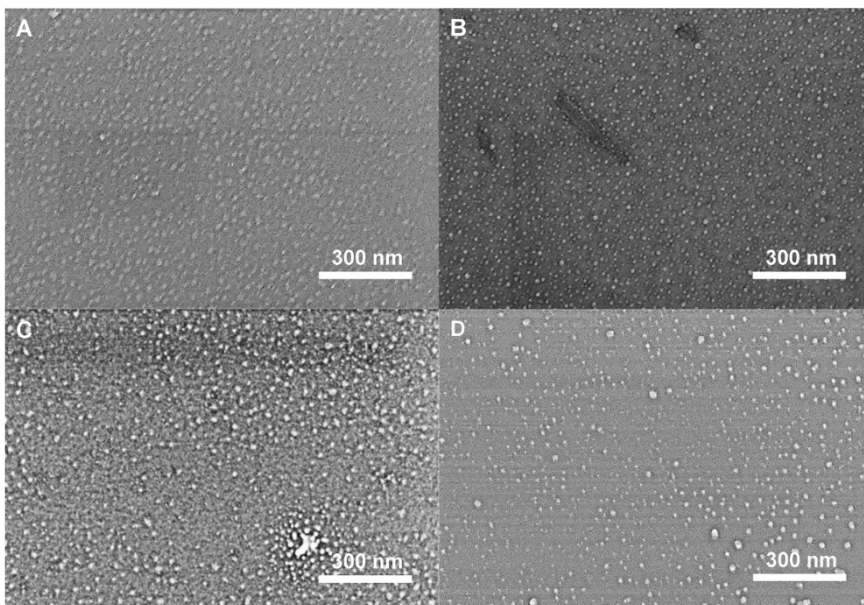

**Fig. S7** SEM images of the SERS substrate prepared by P-1 (A), P-2 (B), P-3 (C) and P-4 (D).

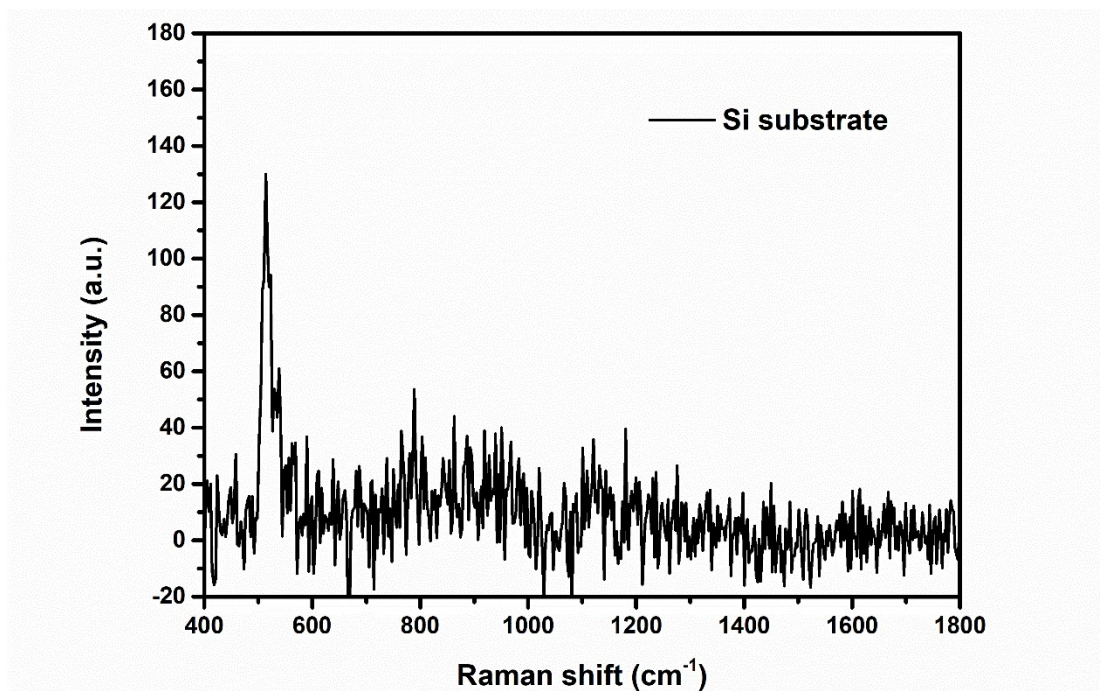

**Fig. S8** Raman spectra of Si substrate (characteristic peak shifted from original  $520\text{ cm}^{-1}$  to  $514\text{ cm}^{-1}$ ).

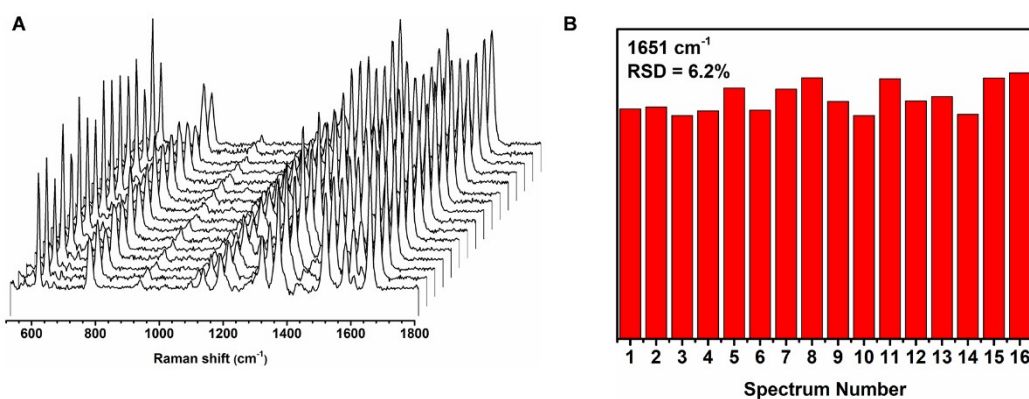

**Fig. S9** (A) Raman spectra of R6G from 16 randomly selected spots on the SERS substrate. (B) Peak intensities of R6G at  $1651\text{ cm}^{-1}$  with RSD of 6.2%.

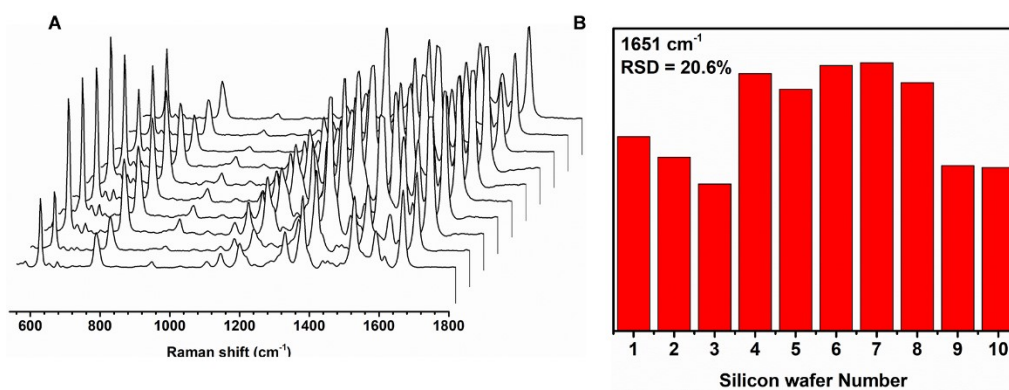

**Fig. S10** (A) Raman spectra of R6G from 10 different SERS substrates. (B) Peak intensities

of R6G at  $1651\text{ cm}^{-1}$  with RSD of 20.6%.

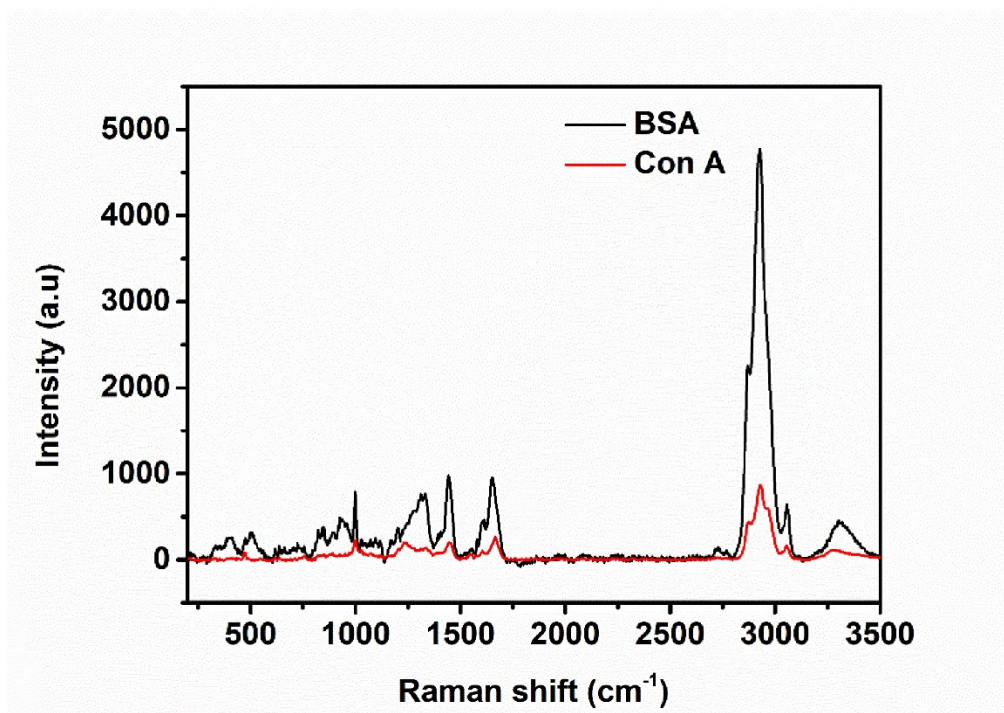

Fig. S11 Raman spectra of solid Con A and BSA.

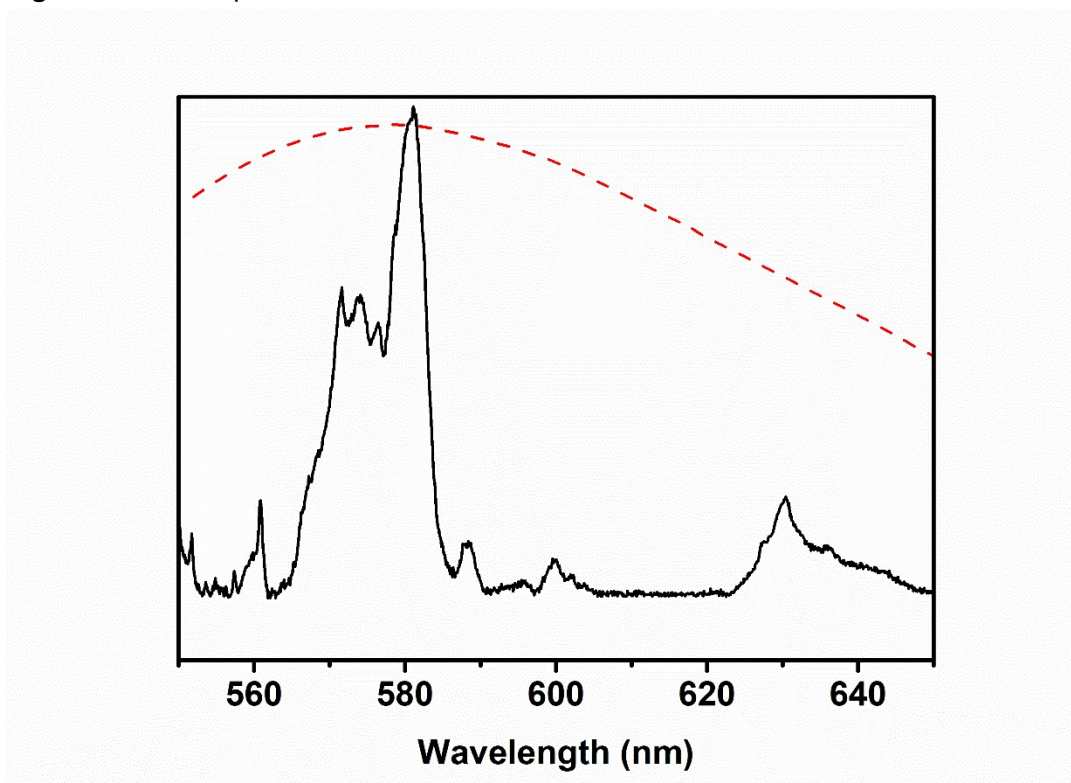

Fig. S12 Raman spectrum of Con A dropped directly onto the SERS substrate (black solid line) and fluorescence spectrum of Con A (red dash line). The unit of Raman spectrum is uniformly converted to nm by LabSpec software.

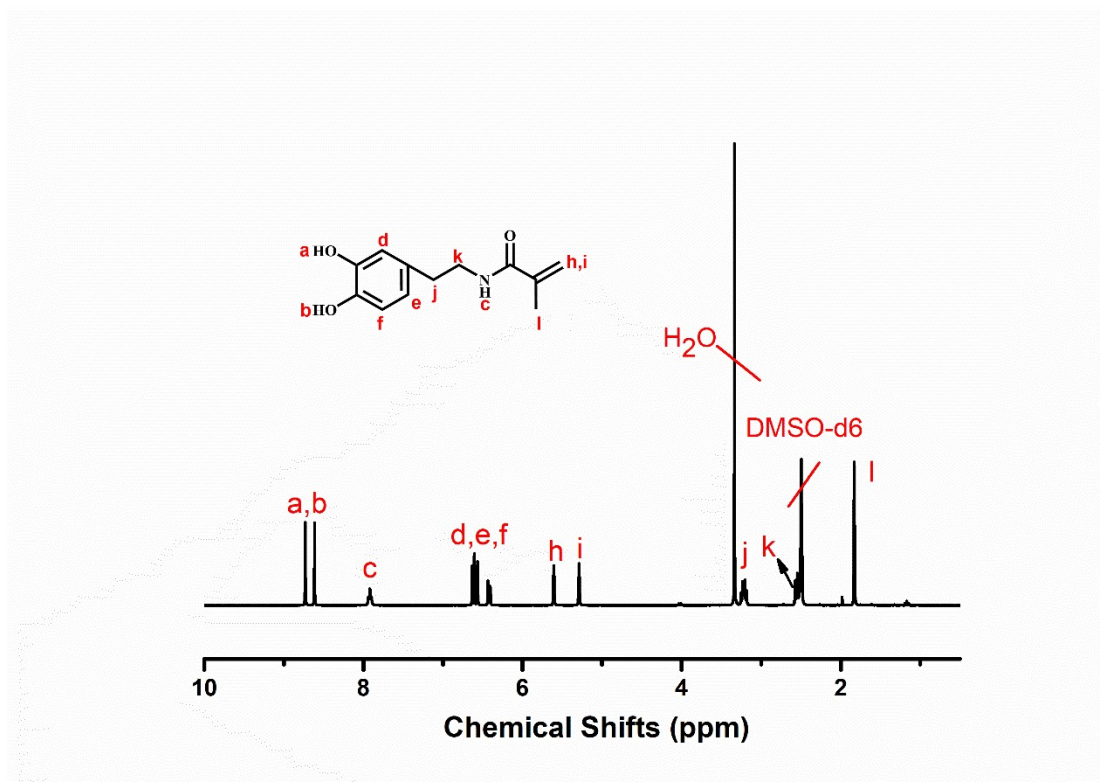

Fig. S13  $^1\text{H}$  NMR spectra of DMA in  $\text{DMSO-d}_6$ .

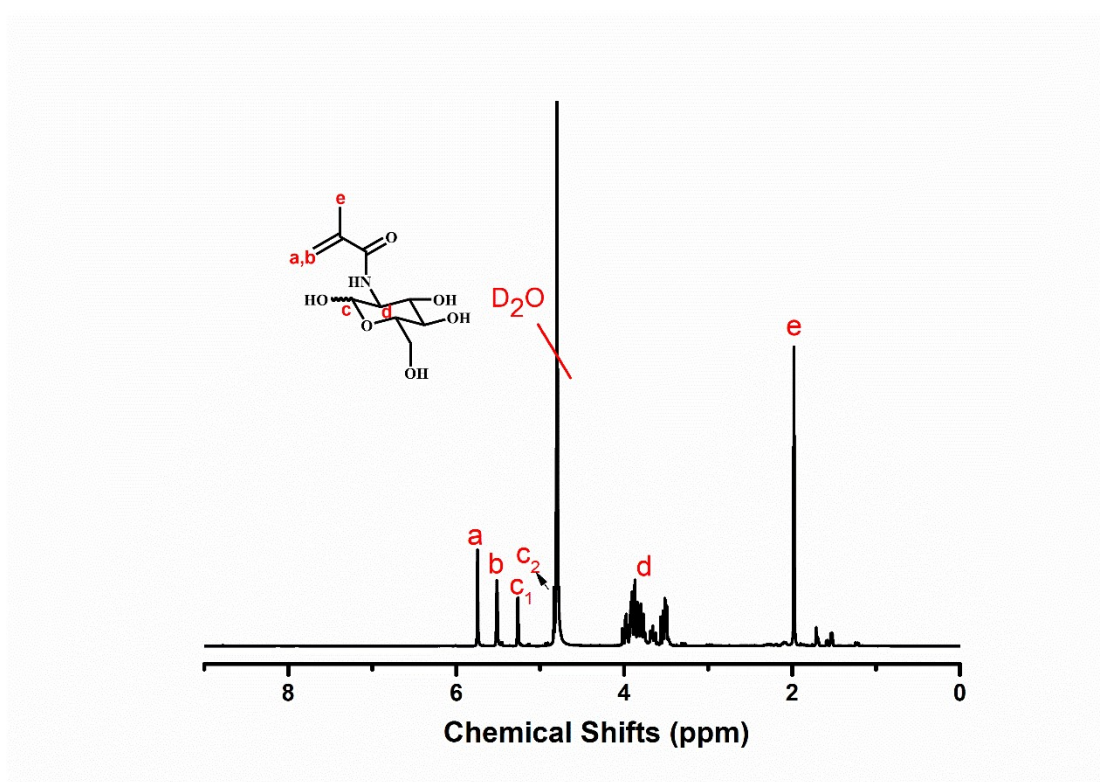

Fig. S14  $^1\text{H}$  NMR spectra of MAG in  $\text{D}_2\text{O}$ .
